# Supplementary material for: Macrophage recruitment in immune-privileged lens during capsule repair, necrotic fiber removal, and fibrosis
Source: PubMed Central journal article supplement — iScience. 2021 May 12;24(6):102533. doi: 10.1016/j.isci.2021.102533 (PMC8188486; doi:10.1016/j.isci.2021.102533), 2021-05-12

**iScience, Volume 24**

**Supplemental information**

**Macrophage recruitment in immune-privileged lens  
during capsule repair, necrotic  
fiber removal, and fibrosis**

**Yuting Li, Zhen Li, Yumeng Quan, Hongyun Cheng, Manuel A. Riquelme, Xiao-Dong Li, Sumin Gu, and Jean X. Jiang**

**Figure S1. Deletion of both Cx50 and AQP0 in dKO attenuated lens growth and increased extracellular spaces, Related to STAR Methods.** (A) Weight and (B) diameter of lenses of WT, Cx50 KO, AQP0 KO and dKO mice at various ages. (C) The ratio of lens weight to volume. (D) H&E images of dKO lens at various ages (n=3) and the percentages of empty extracellular spaces to entire lens areas in dKO lens.

**Figure S2. Disorganization of lens structures and gradual disappearance of “tail-like” tissue at lens posterior during lens development of dKO mice, Related to STAR Methods.** (A) Images of H&E stained midsagittal paraffin tissue sections of lenses from WT (upper panel) and dKO (lower panel) mice at various development periods. Scale bar = 500  $\mu\text{m}$ . (B) A diagram illustrating higher resolution images of different lens regions (indicated by frames) of WT and dKO at various development periods; (C) epithelium and anterior region; (D) equator region; (E) central region, and (F) posterior region. Empty extracellular space (asterisks), disorganized central nuclei (black arrowheads), liquefaction necrosis (black arrows), and macrophages (empty black arrows). Scale bar = 50  $\mu\text{m}$  in C-F.

**Figure S3. Increased apoptotic lens fibers in dKO, Related to STAR Methods.** (A) A diagram illustrating higher resolution cryosection images of different lens regions of WT and dKO (indicated by frames) at P15 and P30. (B-D) Fluorescence images of co-immunostaining with anti-CD68 (red), anti-caspase-3 (Casp-3, purple) and Cx46 antibody (Cx46, green) at equator region (B), central region (C), and the “tail-like” region (D). Scale bar = 50  $\mu\text{m}$ .

**Figure S4. Thickness of anterior capsule, Related to Figure 4E.** The thickness of anterior capsule in WT and dKO lenses (n=3) at P15, P60 and 1 year. \*\*, P < 0.01; \*\*\*\*, P < 0.0001.

**Figure S5. TGF- $\beta$ , VEGF- $\alpha$  and GAL-3 are involved in capsule sealing by fibrosis, Related to STAR Methods.** The mRNA expression of (A) TGF $\beta$ 1, (B) VEGFA and (C) LGALS3 in WT (n=7), Cx50 KO (n=7), MIP KO (n=7) and dKO (n=7) lenses at P15. \*\*\*, P < 0.001; \*\*\*\*, P < 0.0001.

Fig. S1

**A**

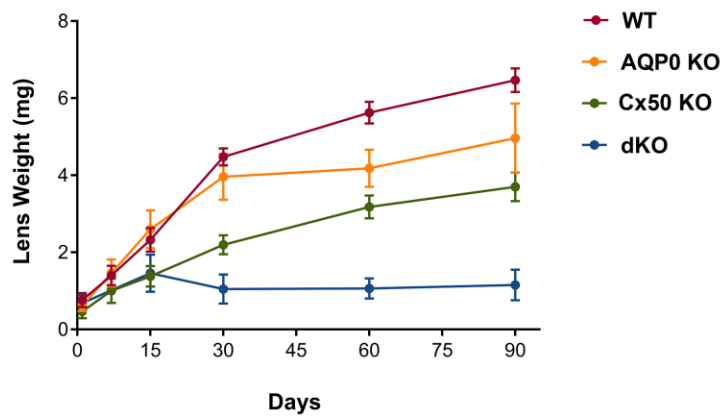

**B**

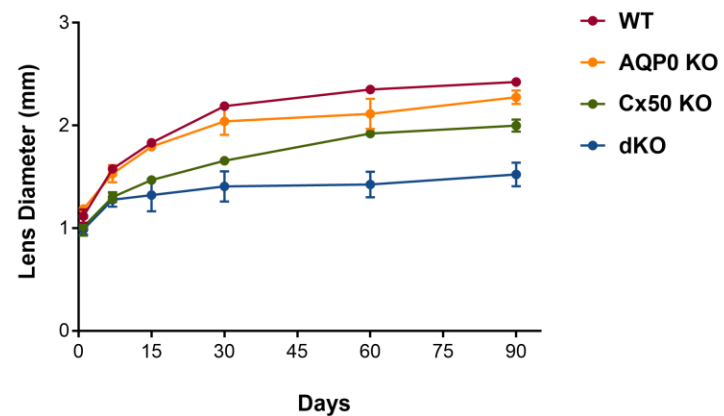

**C**

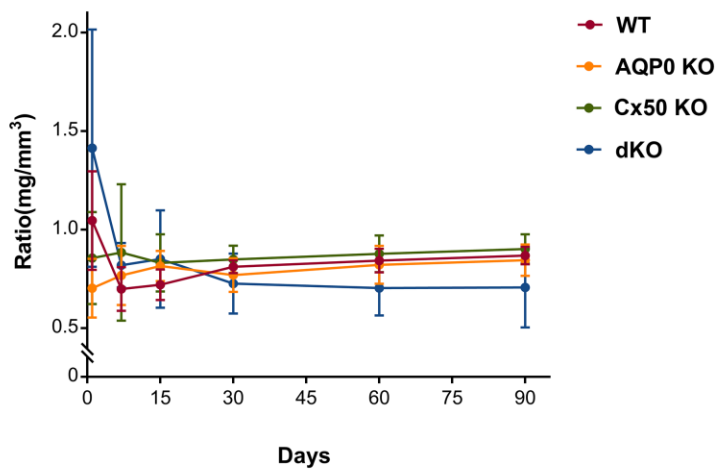

**D**

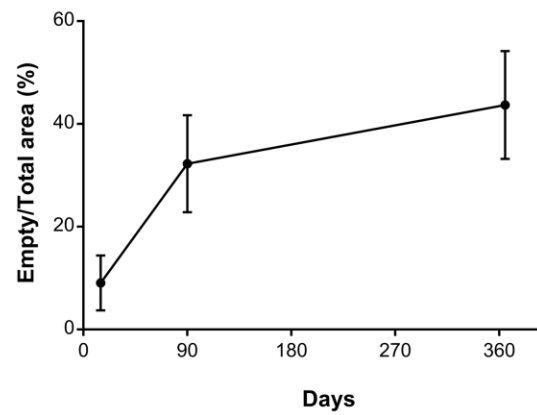

Fig. S2

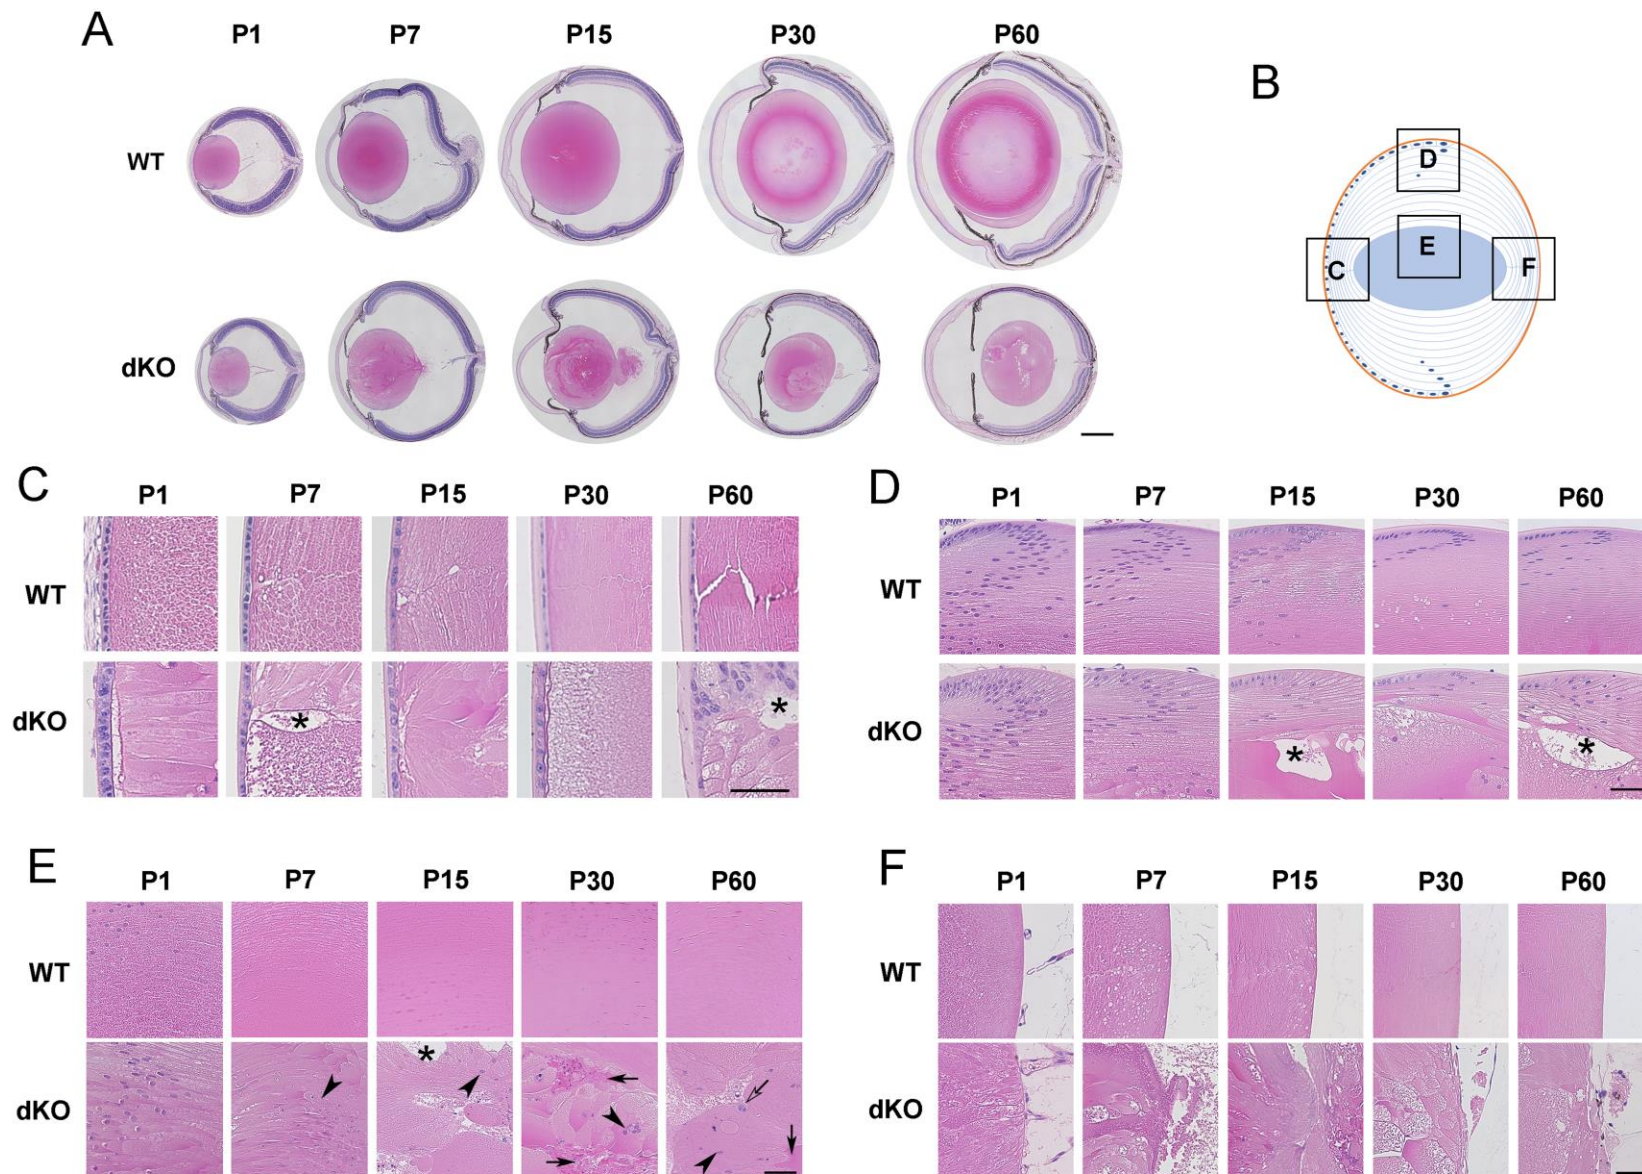

Fig. S3

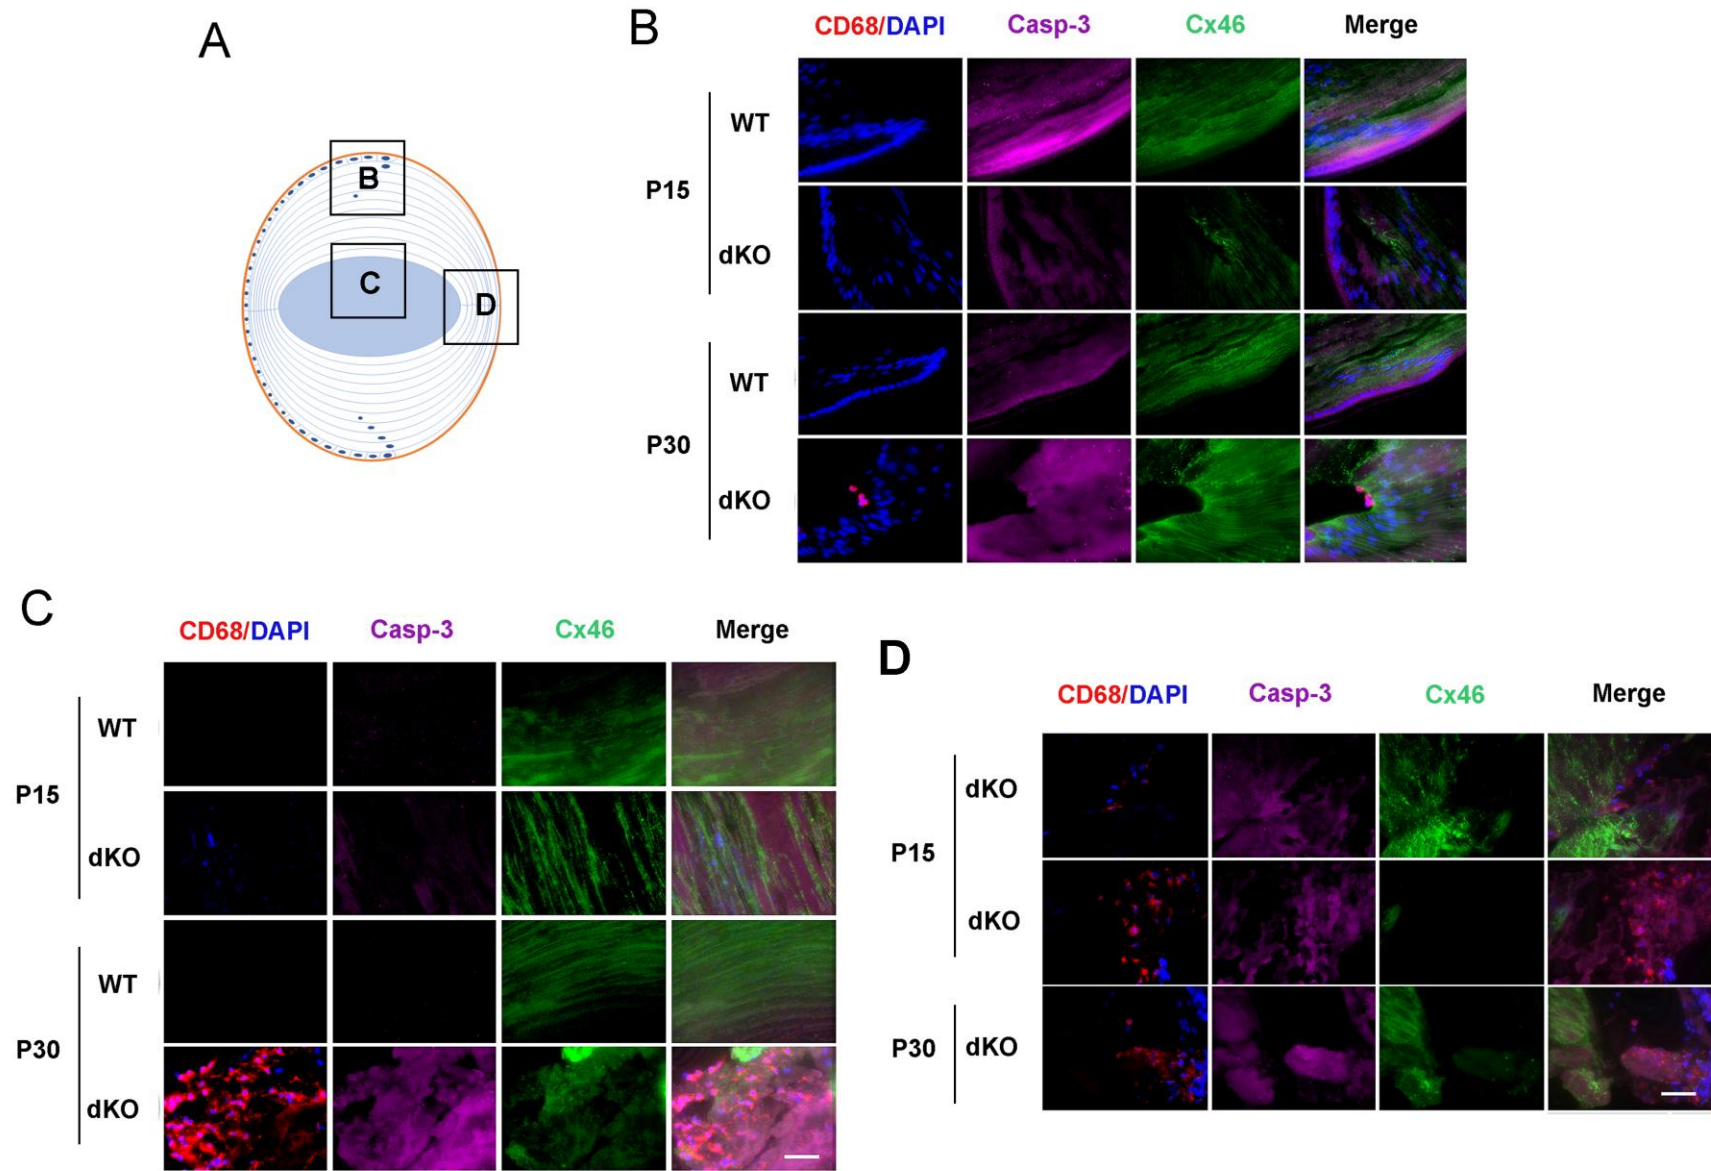

Fig. S4

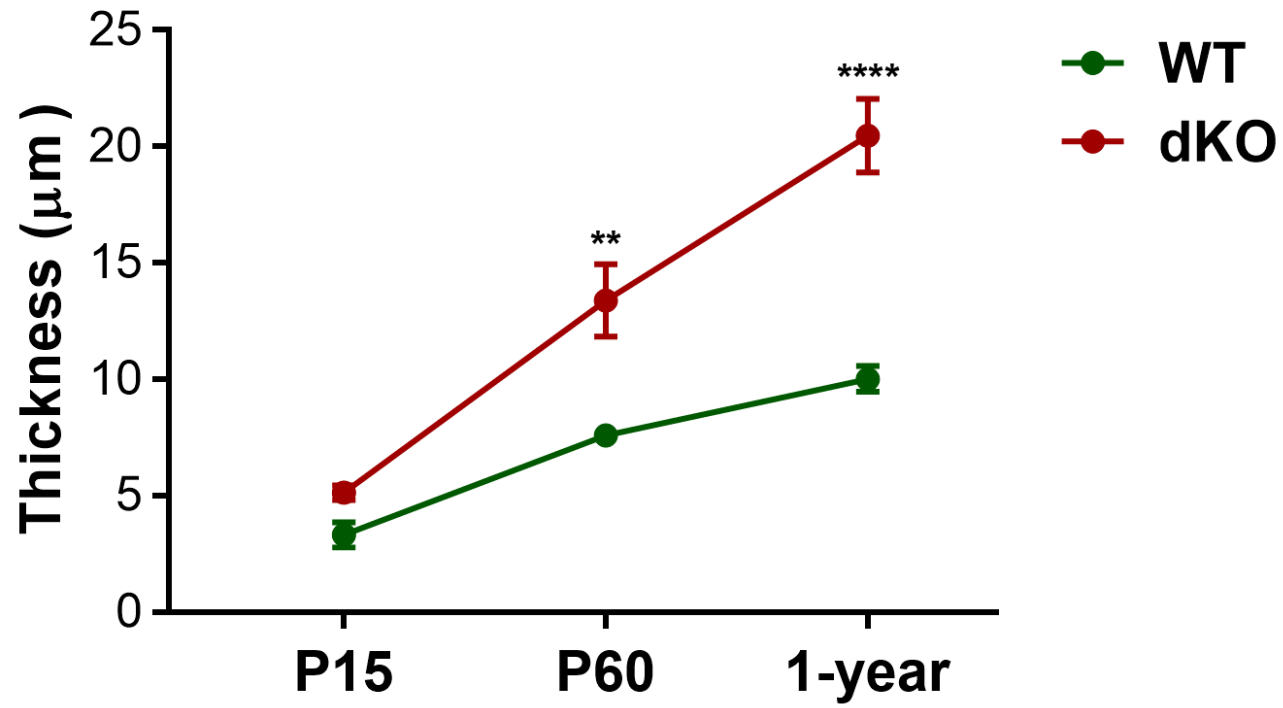

Fig. S5

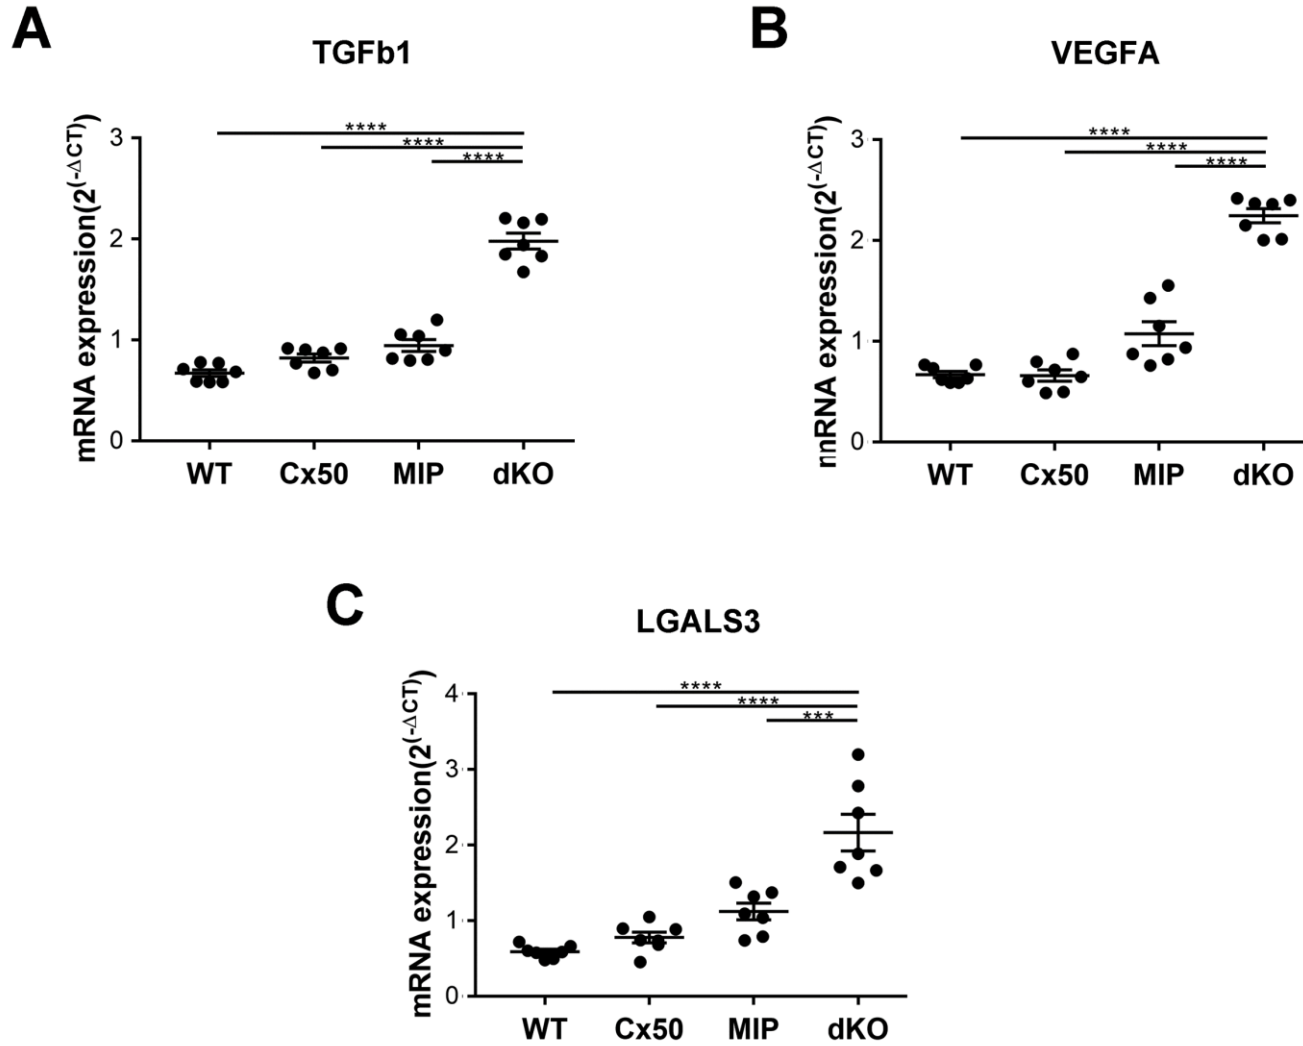

Supplement: mmc1.pdf [file mmc1.pdf]
